# Supplementary material for: A buoyancy, balance and stability challenge to the hypothesis of a semi-aquatic Spinosaurus Stromer, 1915 (Dinosauria: Theropoda)
Source: PeerJ. 2018 Aug 16;6:e5409. doi: 10.7717/peerj.5409 (PMC6098948; doi:10.7717/peerj.5409)
Supplement: Supplemental Information 6 — Multiple sets of 5 numbers that describe each polygon in terms of the vertices defined in "body.vertex.dat". The first number in set is the number of vertices for a given polygon, the remaining four are the four vertices of the polygon. [file peerj-06-5409-s006.dat]

1378	16	15	14	13	12
11	10	9	8	7	6
5	4	3	2	1	0
4	0	1	17	16	4
1	2	18	17	4	2
3	19	18	4	3	4
20	19	4	4	5	21
20	4	5	6	22	21
4	6	7	23	22	4
7	8	24	23	4	8
9	25	24	4	9	10
26	25	4	10	11	27
26	4	11	12	28	27
4	12	13	29	28	4
13	14	30	29	4	14
15	31	30	4	15	0
16	31	4	16	17	33
32	4	17	18	34	33
4	18	19	35	34	4
19	20	36	35	4	20
21	37	36	4	21	22
38	37	4	22	23	39
38	4	23	24	40	39
4	24	25	41	40	4
25	26	42	41	4	26
27	43	42	4	27	28
44	43	4	28	29	45
44	4	29	30	46	45
4	30	31	47	46	4
31	16	32	47	4	32
33	49	48	4	33	34
50	49	4	34	35	51
50	4	35	36	52	51
4	36	37	53	52	4
37	38	54	53	4	38
39	55	54	4	39	40
56	55	4	40	41	57
56	4	41	42	58	57
4	42	43	59	58	4
43	44	60	59	4	44
45	61	60	4	45	46
62	61	4	46	47	63
62	4	47	32	48	63
4	48	49	65	64	4
49	50	66	65	4	50
51	67	66	4	51	52
68	67	4	52	53	69
68	4	53	54	70	69
4	54	55	71	70	4
55	56	72	71	4	56
57	73	72	4	57	58
74	73	4	58	59	75
74	4	59	60	76	75
4	60	61	77	76	4
61	62	78	77	4	62
63	79	78	4	63	48
64	79	4	64	65	81
80	4	65	66	82	81
4	66	67	83	82	4
67	68	84	83	4	68
69	85	84	4	69	70
86	85	4	70	71	87
86	4	71	72	88	87
4	72	73	89	88	4
73	74	90	89	4	74
75	91	90	4	75	76
92	91	4	76	77	93
92	4	77	78	94	93
4	78	79	95	94	4
79	64	80	95	4	80
81	97	96	4	81	82
98	97	4	82	83	99
98	4	83	84	100	99
4	84	85	101	100	4
85	86	102	101	4	86
87	103	102	4	87	88
104	103	4	88	89	105
104	4	89	90	106	105
4	90	91	107	106	4
91	92	108	107	4	92
93	109	108	4	93	94
110	109	4	94	95	111
110	4	95	80	96	111
4	96	97	113	112	4
97	98	114	113	4	98
99	115	114	4	99	100
116	115	4	100	101	117
116	4	101	102	118	117
4	102	103	119	118	4
103	104	120	119	4	104
105	121	120	4	105	106
122	121	4	106	107	123
122	4	107	108	124	123
4	108	109	125	124	4
109	110	126	125	4	110
111	127	126	4	111	96
112	127	4	112	113	129
128	4	113	114	130	129
4	114	115	131	130	4
115	116	132	131	4	116
117	133	132	4	117	118
134	133	4	118	119	135
134	4	119	120	136	135
4	120	121	137	136	4
121	122	138	137	4	122
123	139	138	4	123	124
140	139	4	124	125	141
140	4	125	126	142	141
4	126	127	143	142	4
127	112	128	143	4	128
129	145	144	4	129	130
146	145	4	130	131	147
146	4	131	132	148	147
4	132	133	149	148	4
133	134	150	149	4	134
135	151	150	4	135	136
152	151	4	136	137	153
152	4	137	138	154	153
4	138	139	155	154	4
139	140	156	155	4	140
141	157	156	4	141	142
158	157	4	142	143	159
158	4	143	128	144	159
4	144	145	161	160	4
145	146	162	161	4	146
147	163	162	4	147	148
164	163	4	148	149	165
164	4	149	150	166	165
4	150	151	167	166	4
151	152	168	167	4	152
153	169	168	4	153	154
170	169	4	154	155	171
170	4	155	156	172	171
4	156	157	173	172	4
157	158	174	173	4	158
159	175	174	4	159	144
160	175	4	160	161	177
176	4	161	162	178	177
4	162	163	179	178	4
163	164	180	179	4	164
165	181	180	4	165	166
182	181	4	166	167	183
182	4	167	168	184	183
4	168	169	185	184	4
169	170	186	185	4	170
171	187	186	4	171	172
188	187	4	172	173	189
188	4	173	174	190	189
4	174	175	191	190	4
175	160	176	191	4	176
177	193	192	4	177	178
194	193	4	178	179	195
194	4	179	180	196	195
4	180	181	197	196	4
181	182	198	197	4	182
183	199	198	4	183	184
200	199	4	184	185	201
200	4	185	186	202	201
4	186	187	203	202	4
187	188	204	203	4	188
189	205	204	4	189	190
206	205	4	190	191	207
206	4	191	176	192	207
4	192	193	209	208	4
193	194	210	209	4	194
195	211	210	4	195	196
212	211	4	196	197	213
212	4	197	198	214	213
4	198	199	215	214	4
199	200	216	215	4	200
201	217	216	4	201	202
218	217	4	202	203	219
218	4	203	204	220	219
4	204	205	221	220	4
205	206	222	221	4	206
207	223	222	4	207	192
208	223	4	208	209	225
224	4	209	210	226	225
4	210	211	227	226	4
211	212	228	227	4	212
213	229	228	4	213	214
230	229	4	214	215	231
230	4	215	216	232	231
4	216	217	233	232	4
217	218	234	233	4	218
219	235	234	4	219	220
236	235	4	220	221	237
236	4	221	222	238	237
4	222	223	239	238	4
223	208	224	239	4	224
225	241	240	4	225	226
242	241	4	226	227	243
242	4	227	228	244	243
4	228	229	245	244	4
229	230	246	245	4	230
231	247	246	4	231	232
248	247	4	232	233	249
248	4	233	234	250	249
4	234	235	251	250	4
235	236	252	251	4	236
237	253	252	4	237	238
254	253	4	238	239	255
254	4	239	224	240	255
4	240	241	257	256	4
241	242	258	257	4	242
243	259	258	4	243	244
260	259	4	244	245	261
260	4	245	246	262	261
4	246	247	263	262	4
247	248	264	263	4	248
249	265	264	4	249	250
266	265	4	250	251	267
266	4	251	252	268	267
4	252	253	269	268	4
253	254	270	269	4	254
255	271	270	4	255	240
256	271	4	256	257	273
272	4	257	258	274	273
4	258	259	275	274	4
259	260	276	275	4	260
261	277	276	4	261	262
278	277	4	262	263	279
278	4	263	264	280	279
4	264	265	281	280	4
265	266	282	281	4	266
267	283	282	4	267	268
284	283	4	268	269	285
284	4	269	270	286	285
4	270	271	287	286	4
271	256	272	287	4	272
273	289	288	4	273	274
290	289	4	274	275	291
290	4	275	276	292	291
4	276	277	293	292	4
277	278	294	293	4	278
279	295	294	4	279	280
296	295	4	280	281	297
296	4	281	282	298	297
4	282	283	299	298	4
283	284	300	299	4	284
285	301	300	4	285	286
302	301	4	286	287	303
302	4	287	272	288	303
4	288	289	305	304	4
289	290	306	305	4	290
291	307	306	4	291	292
308	307	4	292	293	309
308	4	293	294	310	309
4	294	295	311	310	4
295	296	312	311	4	296
297	313	312	4	297	298
314	313	4	298	299	315
314	4	299	300	316	315
4	300	301	317	316	4
301	302	318	317	4	302
303	319	318	4	303	288
304	319	4	304	305	321
320	4	305	306	322	321
4	306	307	323	322	4
307	308	324	323	4	308
309	325	324	4	309	310
326	325	4	310	311	327
326	4	311	312	328	327
4	312	313	329	328	4
313	314	330	329	4	314
315	331	330	4	315	316
332	331	4	316	317	333
332	4	317	318	334	333
4	318	319	335	334	4
319	304	320	335	4	320
321	337	336	4	321	322
338	337	4	322	323	339
338	4	323	324	340	339
4	324	325	341	340	4
325	326	342	341	4	326
327	343	342	4	327	328
344	343	4	328	329	345
344	4	329	330	346	345
4	330	331	347	346	4
331	332	348	347	4	332
333	349	348	4	333	334
350	349	4	334	335	351
350	4	335	320	336	351
4	336	337	353	352	4
337	338	354	353	4	338
339	355	354	4	339	340
356	355	4	340	341	357
356	4	341	342	358	357
4	342	343	359	358	4
343	344	360	359	4	344
345	361	360	4	345	346
362	361	4	346	347	363
362	4	347	348	364	363
4	348	349	365	364	4
349	350	366	365	4	350
351	367	366	4	351	336
352	367	4	352	353	369
368	4	353	354	370	369
4	354	355	371	370	4
355	356	372	371	4	356
357	373	372	4	357	358
374	373	4	358	359	375
374	4	359	360	376	375
4	360	361	377	376	4
361	362	378	377	4	362
363	379	378	4	363	364
380	379	4	364	365	381
380	4	365	366	382	381
4	366	367	383	382	4
367	352	368	383	4	368
369	385	384	4	369	370
386	385	4	370	371	387
386	4	371	372	388	387
4	372	373	389	388	4
373	374	390	389	4	374
375	391	390	4	375	376
392	391	4	376	377	393
392	4	377	378	394	393
4	378	379	395	394	4
379	380	396	395	4	380
381	397	396	4	381	382
398	397	4	382	383	399
398	4	383	368	384	399
4	384	385	401	400	4
385	386	402	401	4	386
387	403	402	4	387	388
404	403	4	388	389	405
404	4	389	390	406	405
4	390	391	407	406	4
391	392	408	407	4	392
393	409	408	4	393	394
410	409	4	394	395	411
410	4	395	396	412	411
4	396	397	413	412	4
397	398	414	413	4	398
399	415	414	4	399	384
400	415	4	400	401	417
416	4	401	402	418	417
4	402	403	419	418	4
403	404	420	419	4	404
405	421	420	4	405	406
422	421	4	406	407	423
422	4	407	408	424	423
4	408	409	425	424	4
409	410	426	425	4	410
411	427	426	4	411	412
428	427	4	412	413	429
428	4	413	414	430	429
4	414	415	431	430	4
415	400	416	431	4	416
417	433	432	4	417	418
434	433	4	418	419	435
434	4	419	420	436	435
4	420	421	437	436	4
421	422	438	437	4	422
423	439	438	4	423	424
440	439	4	424	425	441
440	4	425	426	442	441
4	426	427	443	442	4
427	428	444	443	4	428
429	445	444	4	429	430
446	445	4	430	431	447
446	4	431	416	432	447
4	432	433	449	448	4
433	434	450	449	4	434
435	451	450	4	435	436
452	451	4	436	437	453
452	4	437	438	454	453
4	438	439	455	454	4
439	440	456	455	4	440
441	457	456	4	441	442
458	457	4	442	443	459
458	4	443	444	460	459
4	444	445	461	460	4
445	446	462	461	4	446
447	463	462	4	447	432
448	463	4	448	449	465
464	4	449	450	466	465
4	450	451	467	466	4
451	452	468	467	4	452
453	469	468	4	453	454
470	469	4	454	455	471
470	4	455	456	472	471
4	456	457	473	472	4
457	458	474	473	4	458
459	475	474	4	459	460
476	475	4	460	461	477
476	4	461	462	478	477
4	462	463	479	478	4
463	448	464	479	4	464
465	481	480	4	465	466
482	481	4	466	467	483
482	4	467	468	484	483
4	468	469	485	484	4
469	470	486	485	4	470
471	487	486	4	471	472
488	487	4	472	473	489
488	4	473	474	490	489
4	474	475	491	490	4
475	476	492	491	4	476
477	493	492	4	477	478
494	493	4	478	479	495
494	4	479	464	480	495
4	480	481	497	496	4
481	482	498	497	4	482
483	499	498	4	483	484
500	499	4	484	485	501
500	4	485	486	502	501
4	486	487	503	502	4
487	488	504	503	4	488
489	505	504	4	489	490
506	505	4	490	491	507
506	4	491	492	508	507
4	492	493	509	508	4
493	494	510	509	4	494
495	511	510	4	495	480
496	511	4	496	497	513
512	4	497	498	514	513
4	498	499	515	514	4
499	500	516	515	4	500
501	517	516	4	501	502
518	517	4	502	503	519
518	4	503	504	520	519
4	504	505	521	520	4
505	506	522	521	4	506
507	523	522	4	507	508
524	523	4	508	509	525
524	4	509	510	526	525
4	510	511	527	526	4
511	496	512	527	4	512
513	529	528	4	513	514
530	529	4	514	515	531
530	4	515	516	532	531
4	516	517	533	532	4
517	518	534	533	4	518
519	535	534	4	519	520
536	535	4	520	521	537
536	4	521	522	538	537
4	522	523	539	538	4
523	524	540	539	4	524
525	541	540	4	525	526
542	541	4	526	527	543
542	4	527	512	528	543
4	528	529	545	544	4
529	530	546	545	4	530
531	547	546	4	531	532
548	547	4	532	533	549
548	4	533	534	550	549
4	534	535	551	550	4
535	536	552	551	4	536
537	553	552	4	537	538
554	553	4	538	539	555
554	4	539	540	556	555
4	540	541	557	556	4
541	542	558	557	4	542
543	559	558	4	543	528
544	559	4	544	545	561
560	4	545	546	562	561
4	546	547	563	562	4
547	548	564	563	4	548
549	565	564	4	549	550
566	565	4	550	551	567
566	4	551	552	568	567
4	552	553	569	568	4
553	554	570	569	4	554
555	571	570	4	555	556
572	571	4	556	557	573
572	4	557	558	574	573
4	558	559	575	574	4
559	544	560	575	4	560
561	577	576	4	561	562
578	577	4	562	563	579
578	4	563	564	580	579
4	564	565	581	580	4
565	566	582	581	4	566
567	583	582	4	567	568
584	583	4	568	569	585
584	4	569	570	586	585
4	570	571	587	586	4
571	572	588	587	4	572
573	589	588	4	573	574
590	589	4	574	575	591
590	4	575	560	576	591
4	576	577	593	592	4
577	578	594	593	4	578
579	595	594	4	579	580
596	595	4	580	581	597
596	4	581	582	598	597
4	582	583	599	598	4
583	584	600	599	4	584
585	601	600	4	585	586
602	601	4	586	587	603
602	4	587	588	604	603
4	588	589	605	604	4
589	590	606	605	4	590
591	607	606	4	591	576
592	607	4	592	593	609
608	4	593	594	610	609
4	594	595	611	610	4
595	596	612	611	4	596
597	613	612	4	597	598
614	613	4	598	599	615
614	4	599	600	616	615
4	600	601	617	616	4
601	602	618	617	4	602
603	619	618	4	603	604
620	619	4	604	605	621
620	4	605	606	622	621
4	606	607	623	622	4
607	592	608	623	4	608
609	625	624	4	609	610
626	625	4	610	611	627
626	4	611	612	628	627
4	612	613	629	628	4
613	614	630	629	4	614
615	631	630	4	615	616
632	631	4	616	617	633
632	4	617	618	634	633
4	618	619	635	634	4
619	620	636	635	4	620
621	637	636	4	621	622
638	637	4	622	623	639
638	4	623	608	624	639
4	624	625	641	640	4
625	626	642	641	4	626
627	643	642	4	627	628
644	643	4	628	629	645
644	4	629	630	646	645
4	630	631	647	646	4
631	632	648	647	4	632
633	649	648	4	633	634
650	649	4	634	635	651
650	4	635	636	652	651
4	636	637	653	652	4
637	638	654	653	4	638
639	655	654	4	639	624
640	655	4	640	641	657
656	4	641	642	658	657
4	642	643	659	658	4
643	644	660	659	4	644
645	661	660	4	645	646
662	661	4	646	647	663
662	4	647	648	664	663
4	648	649	665	664	4
649	650	666	665	4	650
651	667	666	4	651	652
668	667	4	652	653	669
668	4	653	654	670	669
4	654	655	671	670	4
655	640	656	671	4	656
657	673	672	4	657	658
674	673	4	658	659	675
674	4	659	660	676	675
4	660	661	677	676	4
661	662	678	677	4	662
663	679	678	4	663	664
680	679	4	664	665	681
680	4	665	666	682	681
4	666	667	683	682	4
667	668	684	683	4	668
669	685	684	4	669	670
686	685	4	670	671	687
686	4	671	656	672	687
4	672	673	689	688	4
673	674	690	689	4	674
675	691	690	4	675	676
692	691	4	676	677	693
692	4	677	678	694	693
4	678	679	695	694	4
679	680	696	695	4	680
681	697	696	4	681	682
698	697	4	682	683	699
698	4	683	684	700	699
4	684	685	701	700	4
685	686	702	701	4	686
687	703	702	4	687	672
688	703	4	688	689	705
704	4	689	690	706	705
4	690	691	707	706	4
691	692	708	707	4	692
693	709	708	4	693	694
710	709	4	694	695	711
710	4	695	696	712	711
4	696	697	713	712	4
697	698	714	713	4	698
699	715	714	4	699	700
716	715	4	700	701	717
716	4	701	702	718	717
4	702	703	719	718	4
703	688	704	719	4	704
705	721	720	4	705	706
722	721	4	706	707	723
722	4	707	708	724	723
4	708	709	725	724	4
709	710	726	725	4	710
711	727	726	4	711	712
728	727	4	712	713	729
728	4	713	714	730	729
4	714	715	731	730	4
715	716	732	731	4	716
717	733	732	4	717	718
734	733	4	718	719	735
734	4	719	704	720	735
4	720	721	737	736	4
721	722	738	737	4	722
723	739	738	4	723	724
740	739	4	724	725	741
740	4	725	726	742	741
4	726	727	743	742	4
727	728	744	743	4	728
729	745	744	4	729	730
746	745	4	730	731	747
746	4	731	732	748	747
4	732	733	749	748	4
733	734	750	749	4	734
735	751	750	4	735	720
736	751	4	736	737	753
752	4	737	738	754	753
4	738	739	755	754	4
739	740	756	755	4	740
741	757	756	4	741	742
758	757	4	742	743	759
758	4	743	744	760	759
4	744	745	761	760	4
745	746	762	761	4	746
747	763	762	4	747	748
764	763	4	748	749	765
764	4	749	750	766	765
4	750	751	767	766	4
751	736	752	767	4	752
753	769	768	4	753	754
770	769	4	754	755	771
770	4	755	756	772	771
4	756	757	773	772	4
757	758	774	773	4	758
759	775	774	4	759	760
776	775	4	760	761	777
776	4	761	762	778	777
4	762	763	779	778	4
763	764	780	779	4	764
765	781	780	4	765	766
782	781	4	766	767	783
782	4	767	752	768	783
4	768	769	785	784	4
769	770	786	785	4	770
771	787	786	4	771	772
788	787	4	772	773	789
788	4	773	774	790	789
4	774	775	791	790	4
775	776	792	791	4	776
777	793	792	4	777	778
794	793	4	778	779	795
794	4	779	780	796	795
4	780	781	797	796	4
781	782	798	797	4	782
783	799	798	4	783	768
784	799	4	784	785	801
800	4	785	786	802	801
4	786	787	803	802	4
787	788	804	803	4	788
789	805	804	4	789	790
806	805	4	790	791	807
806	4	791	792	808	807
4	792	793	809	808	4
793	794	810	809	4	794
795	811	810	4	795	796
812	811	4	796	797	813
812	4	797	798	814	813
4	798	799	815	814	4
799	784	800	815	4	800
801	817	816	4	801	802
818	817	4	802	803	819
818	4	803	804	820	819
4	804	805	821	820	4
805	806	822	821	4	806
807	823	822	4	807	808
824	823	4	808	809	825
824	4	809	810	826	825
4	810	811	827	826	4
811	812	828	827	4	812
813	829	828	4	813	814
830	829	4	814	815	831
830	4	815	800	816	831
4	816	817	833	832	4
817	818	834	833	4	818
819	835	834	4	819	820
836	835	4	820	821	837
836	4	821	822	838	837
4	822	823	839	838	4
823	824	840	839	4	824
825	841	840	4	825	826
842	841	4	826	827	843
842	4	827	828	844	843
4	828	829	845	844	4
829	830	846	845	4	830
831	847	846	4	831	816
832	847	4	832	833	849
848	4	833	834	850	849
4	834	835	851	850	4
835	836	852	851	4	836
837	853	852	4	837	838
854	853	4	838	839	855
854	4	839	840	856	855
4	840	841	857	856	4
841	842	858	857	4	842
843	859	858	4	843	844
860	859	4	844	845	861
860	4	845	846	862	861
4	846	847	863	862	4
847	832	848	863	4	848
849	865	864	4	849	850
866	865	4	850	851	867
866	4	851	852	868	867
4	852	853	869	868	4
853	854	870	869	4	854
855	871	870	4	855	856
872	871	4	856	857	873
872	4	857	858	874	873
4	858	859	875	874	4
859	860	876	875	4	860
861	877	876	4	861	862
878	877	4	862	863	879
878	4	863	848	864	879
4	864	865	881	880	4
865	866	882	881	4	866
867	883	882	4	867	868
884	883	4	868	869	885
884	4	869	870	886	885
4	870	871	887	886	4
871	872	888	887	4	872
873	889	888	4	873	874
890	889	4	874	875	891
890	4	875	876	892	891
4	876	877	893	892	4
877	878	894	893	4	878
879	895	894	4	879	864
880	895	4	880	881	897
896	4	881	882	898	897
4	882	883	899	898	4
883	884	900	899	4	884
885	901	900	4	885	886
902	901	4	886	887	903
902	4	887	888	904	903
4	888	889	905	904	4
889	890	906	905	4	890
891	907	906	4	891	892
908	907	4	892	893	909
908	4	893	894	910	909
4	894	895	911	910	4
895	880	896	911	4	896
897	913	912	4	897	898
914	913	4	898	899	915
914	4	899	900	916	915
4	900	901	917	916	4
901	902	918	917	4	902
903	919	918	4	903	904
920	919	4	904	905	921
920	4	905	906	922	921
4	906	907	923	922	4
907	908	924	923	4	908
909	925	924	4	909	910
926	925	4	910	911	927
926	4	911	896	912	927
4	912	913	929	928	4
913	914	930	929	4	914
915	931	930	4	915	916
932	931	4	916	917	933
932	4	917	918	934	933
4	918	919	935	934	4
919	920	936	935	4	920
921	937	936	4	921	922
938	937	4	922	923	939
938	4	923	924	940	939
4	924	925	941	940	4
925	926	942	941	4	926
927	943	942	4	927	912
928	943	4	928	929	945
944	4	929	930	946	945
4	930	931	947	946	4
931	932	948	947	4	932
933	949	948	4	933	934
950	949	4	934	935	951
950	4	935	936	952	951
4	936	937	953	952	4
937	938	954	953	4	938
939	955	954	4	939	940
956	955	4	940	941	957
956	4	941	942	958	957
4	942	943	959	958	4
943	928	944	959	4	944
945	961	960	4	945	946
962	961	4	946	947	963
962	4	947	948	964	963
4	948	949	965	964	4
949	950	966	965	4	950
951	967	966	4	951	952
968	967	4	952	953	969
968	4	953	954	970	969
4	954	955	971	970	4
955	956	972	971	4	956
957	973	972	4	957	958
974	973	4	958	959	975
974	4	959	944	960	975
4	960	961	977	976	4
961	962	978	977	4	962
963	979	978	4	963	964
980	979	4	964	965	981
980	4	965	966	982	981
4	966	967	983	982	4
967	968	984	983	4	968
969	985	984	4	969	970
986	985	4	970	971	987
986	4	971	972	988	987
4	972	973	989	988	4
973	974	990	989	4	974
975	991	990	4	975	960
976	991	4	976	977	993
992	4	977	978	994	993
4	978	979	995	994	4
979	980	996	995	4	980
981	997	996	4	981	982
998	997	4	982	983	999
998	4	983	984	1000	999
4	984	985	1001	1000	4
985	986	1002	1001	4	986
987	1003	1002	4	987	988
1004	1003	4	988	989	1005
1004	4	989	990	1006	1005
4	990	991	1007	1006	4
991	976	992	1007	4	992
993	1009	1008	4	993	994
1010	1009	4	994	995	1011
1010	4	995	996	1012	1011
4	996	997	1013	1012	4
997	998	1014	1013	4	998
999	1015	1014	4	999	1000
1016	1015	4	1000	1001	1017
1016	4	1001	1002	1018	1017
4	1002	1003	1019	1018	4
1003	1004	1020	1019	4	1004
1005	1021	1020	4	1005	1006
1022	1021	4	1006	1007	1023
1022	4	1007	992	1008	1023
4	1008	1009	1025	1024	4
1009	1010	1026	1025	4	1010
1011	1027	1026	4	1011	1012
1028	1027	4	1012	1013	1029
1028	4	1013	1014	1030	1029
4	1014	1015	1031	1030	4
1015	1016	1032	1031	4	1016
1017	1033	1032	4	1017	1018
1034	1033	4	1018	1019	1035
1034	4	1019	1020	1036	1035
4	1020	1021	1037	1036	4
1021	1022	1038	1037	4	1022
1023	1039	1038	4	1023	1008
1024	1039	4	1024	1025	1041
1040	4	1025	1026	1042	1041
4	1026	1027	1043	1042	4
1027	1028	1044	1043	4	1028
1029	1045	1044	4	1029	1030
1046	1045	4	1030	1031	1047
1046	4	1031	1032	1048	1047
4	1032	1033	1049	1048	4
1033	1034	1050	1049	4	1034
1035	1051	1050	4	1035	1036
1052	1051	4	1036	1037	1053
1052	4	1037	1038	1054	1053
4	1038	1039	1055	1054	4
1039	1024	1040	1055	4	1040
1041	1057	1056	4	1041	1042
1058	1057	4	1042	1043	1059
1058	4	1043	1044	1060	1059
4	1044	1045	1061	1060	4
1045	1046	1062	1061	4	1046
1047	1063	1062	4	1047	1048
1064	1063	4	1048	1049	1065
1064	4	1049	1050	1066	1065
4	1050	1051	1067	1066	4
1051	1052	1068	1067	4	1052
1053	1069	1068	4	1053	1054
1070	1069	4	1054	1055	1071
1070	4	1055	1040	1056	1071
4	1056	1057	1073	1072	4
1057	1058	1074	1073	4	1058
1059	1075	1074	4	1059	1060
1076	1075	4	1060	1061	1077
1076	4	1061	1062	1078	1077
4	1062	1063	1079	1078	4
1063	1064	1080	1079	4	1064
1065	1081	1080	4	1065	1066
1082	1081	4	1066	1067	1083
1082	4	1067	1068	1084	1083
4	1068	1069	1085	1084	4
1069	1070	1086	1085	4	1070
1071	1087	1086	4	1071	1056
1072	1087	4	1072	1073	1089
1088	4	1073	1074	1090	1089
4	1074	1075	1091	1090	4
1075	1076	1092	1091	4	1076
1077	1093	1092	4	1077	1078
1094	1093	4	1078	1079	1095
1094	4	1079	1080	1096	1095
4	1080	1081	1097	1096	4
1081	1082	1098	1097	4	1082
1083	1099	1098	4	1083	1084
1100	1099	4	1084	1085	1101
1100	4	1085	1086	1102	1101
4	1086	1087	1103	1102	4
1087	1072	1088	1103	4	1088
1089	1105	1104	4	1089	1090
1106	1105	4	1090	1091	1107
1106	4	1091	1092	1108	1107
4	1092	1093	1109	1108	4
1093	1094	1110	1109	4	1094
1095	1111	1110	4	1095	1096
1112	1111	4	1096	1097	1113
1112	4	1097	1098	1114	1113
4	1098	1099	1115	1114	4
1099	1100	1116	1115	4	1100
1101	1117	1116	4	1101	1102
1118	1117	4	1102	1103	1119
1118	4	1103	1088	1104	1119
4	1104	1105	1121	1120	4
1105	1106	1122	1121	4	1106
1107	1123	1122	4	1107	1108
1124	1123	4	1108	1109	1125
1124	4	1109	1110	1126	1125
4	1110	1111	1127	1126	4
1111	1112	1128	1127	4	1112
1113	1129	1128	4	1113	1114
1130	1129	4	1114	1115	1131
1130	4	1115	1116	1132	1131
4	1116	1117	1133	1132	4
1117	1118	1134	1133	4	1118
1119	1135	1134	4	1119	1104
1120	1135	4	1120	1121	1137
1136	4	1121	1122	1138	1137
4	1122	1123	1139	1138	4
1123	1124	1140	1139	4	1124
1125	1141	1140	4	1125	1126
1142	1141	4	1126	1127	1143
1142	4	1127	1128	1144	1143
4	1128	1129	1145	1144	4
1129	1130	1146	1145	4	1130
1131	1147	1146	4	1131	1132
1148	1147	4	1132	1133	1149
1148	4	1133	1134	1150	1149
4	1134	1135	1151	1150	4
1135	1120	1136	1151	4	1136
1137	1153	1152	4	1137	1138
1154	1153	4	1138	1139	1155
1154	4	1139	1140	1156	1155
4	1140	1141	1157	1156	4
1141	1142	1158	1157	4	1142
1143	1159	1158	4	1143	1144
1160	1159	4	1144	1145	1161
1160	4	1145	1146	1162	1161
4	1146	1147	1163	1162	4
1147	1148	1164	1163	4	1148
1149	1165	1164	4	1149	1150
1166	1165	4	1150	1151	1167
1166	4	1151	1136	1152	1167
4	1152	1153	1169	1168	4
1153	1154	1170	1169	4	1154
1155	1171	1170	4	1155	1156
1172	1171	4	1156	1157	1173
1172	4	1157	1158	1174	1173
4	1158	1159	1175	1174	4
1159	1160	1176	1175	4	1160
1161	1177	1176	4	1161	1162
1178	1177	4	1162	1163	1179
1178	4	1163	1164	1180	1179
4	1164	1165	1181	1180	4
1165	1166	1182	1181	4	1166
1167	1183	1182	4	1167	1152
1168	1183	4	1168	1169	1185
1184	4	1169	1170	1186	1185
4	1170	1171	1187	1186	4
1171	1172	1188	1187	4	1172
1173	1189	1188	4	1173	1174
1190	1189	4	1174	1175	1191
1190	4	1175	1176	1192	1191
4	1176	1177	1193	1192	4
1177	1178	1194	1193	4	1178
1179	1195	1194	4	1179	1180
1196	1195	4	1180	1181	1197
1196	4	1181	1182	1198	1197
4	1182	1183	1199	1198	4
1183	1168	1184	1199	4	1184
1185	1201	1200	4	1185	1186
1202	1201	4	1186	1187	1203
1202	4	1187	1188	1204	1203
4	1188	1189	1205	1204	4
1189	1190	1206	1205	4	1190
1191	1207	1206	4	1191	1192
1208	1207	4	1192	1193	1209
1208	4	1193	1194	1210	1209
4	1194	1195	1211	1210	4
1195	1196	1212	1211	4	1196
1197	1213	1212	4	1197	1198
1214	1213	4	1198	1199	1215
1214	4	1199	1184	1200	1215
4	1200	1201	1217	1216	4
1201	1202	1218	1217	4	1202
1203	1219	1218	4	1203	1204
1220	1219	4	1204	1205	1221
1220	4	1205	1206	1222	1221
4	1206	1207	1223	1222	4
1207	1208	1224	1223	4	1208
1209	1225	1224	4	1209	1210
1226	1225	4	1210	1211	1227
1226	4	1211	1212	1228	1227
4	1212	1213	1229	1228	4
1213	1214	1230	1229	4	1214
1215	1231	1230	4	1215	1200
1216	1231	4	1216	1217	1233
1232	4	1217	1218	1234	1233
4	1218	1219	1235	1234	4
1219	1220	1236	1235	4	1220
1221	1237	1236	4	1221	1222
1238	1237	4	1222	1223	1239
1238	4	1223	1224	1240	1239
4	1224	1225	1241	1240	4
1225	1226	1242	1241	4	1226
1227	1243	1242	4	1227	1228
1244	1243	4	1228	1229	1245
1244	4	1229	1230	1246	1245
4	1230	1231	1247	1246	4
1231	1216	1232	1247	4	1232
1233	1249	1248	4	1233	1234
1250	1249	4	1234	1235	1251
1250	4	1235	1236	1252	1251
4	1236	1237	1253	1252	4
1237	1238	1254	1253	4	1238
1239	1255	1254	4	1239	1240
1256	1255	4	1240	1241	1257
1256	4	1241	1242	1258	1257
4	1242	1243	1259	1258	4
1243	1244	1260	1259	4	1244
1245	1261	1260	4	1245	1246
1262	1261	4	1246	1247	1263
1262	4	1247	1232	1248	1263
4	1248	1249	1265	1264	4
1249	1250	1266	1265	4	1250
1251	1267	1266	4	1251	1252
1268	1267	4	1252	1253	1269
1268	4	1253	1254	1270	1269
4	1254	1255	1271	1270	4
1255	1256	1272	1271	4	1256
1257	1273	1272	4	1257	1258
1274	1273	4	1258	1259	1275
1274	4	1259	1260	1276	1275
4	1260	1261	1277	1276	4
1261	1262	1278	1277	4	1262
1263	1279	1278	4	1263	1248
1264	1279	4	1264	1265	1281
1280	4	1265	1266	1282	1281
4	1266	1267	1283	1282	4
1267	1268	1284	1283	4	1268
1269	1285	1284	4	1269	1270
1286	1285	4	1270	1271	1287
1286	4	1271	1272	1288	1287
4	1272	1273	1289	1288	4
1273	1274	1290	1289	4	1274
1275	1291	1290	4	1275	1276
1292	1291	4	1276	1277	1293
1292	4	1277	1278	1294	1293
4	1278	1279	1295	1294	4
1279	1264	1280	1295	4	1280
1281	1297	1296	4	1281	1282
1298	1297	4	1282	1283	1299
1298	4	1283	1284	1300	1299
4	1284	1285	1301	1300	4
1285	1286	1302	1301	4	1286
1287	1303	1302	4	1287	1288
1304	1303	4	1288	1289	1305
1304	4	1289	1290	1306	1305
4	1290	1291	1307	1306	4
1291	1292	1308	1307	4	1292
1293	1309	1308	4	1293	1294
1310	1309	4	1294	1295	1311
1310	4	1295	1280	1296	1311
4	1296	1297	1313	1312	4
1297	1298	1314	1313	4	1298
1299	1315	1314	4	1299	1300
1316	1315	4	1300	1301	1317
1316	4	1301	1302	1318	1317
4	1302	1303	1319	1318	4
1303	1304	1320	1319	4	1304
1305	1321	1320	4	1305	1306
1322	1321	4	1306	1307	1323
1322	4	1307	1308	1324	1323
4	1308	1309	1325	1324	4
1309	1310	1326	1325	4	1310
1311	1327	1326	4	1311	1296
1312	1327	4	1312	1313	1329
1328	4	1313	1314	1330	1329
4	1314	1315	1331	1330	4
1315	1316	1332	1331	4	1316
1317	1333	1332	4	1317	1318
1334	1333	4	1318	1319	1335
1334	4	1319	1320	1336	1335
4	1320	1321	1337	1336	4
1321	1322	1338	1337	4	1322
1323	1339	1338	4	1323	1324
1340	1339	4	1324	1325	1341
1340	4	1325	1326	1342	1341
4	1326	1327	1343	1342	4
1327	1312	1328	1343	4	1328
1329	1345	1344	4	1329	1330
1346	1345	4	1330	1331	1347
1346	4	1331	1332	1348	1347
4	1332	1333	1349	1348	4
1333	1334	1350	1349	4	1334
1335	1351	1350	4	1335	1336
1352	1351	4	1336	1337	1353
1352	4	1337	1338	1354	1353
4	1338	1339	1355	1354	4
1339	1340	1356	1355	4	1340
1341	1357	1356	4	1341	1342
1358	1357	4	1342	1343	1359
1358	4	1343	1328	1344	1359
4	1344	1345	1361	1360	4
1345	1346	1362	1361	4	1346
1347	1363	1362	4	1347	1348
1364	1363	4	1348	1349	1365
1364	4	1349	1350	1366	1365
4	1350	1351	1367	1366	4
1351	1352	1368	1367	4	1352
1353	1369	1368	4	1353	1354
1370	1369	4	1354	1355	1371
1370	4	1355	1356	1372	1371
4	1356	1357	1373	1372	4
1357	1358	1374	1373	4	1358
1359	1375	1374	4	1359	1344
1360	1375	4	1360	1361	1377
1376	4	1361	1362	1378	1377
4	1362	1363	1379	1378	4
1363	1364	1380	1379	4	1364
1365	1381	1380	4	1365	1366
1382	1381	4	1366	1367	1383
1382	4	1367	1368	1384	1383
4	1368	1369	1385	1384	4
1369	1370	1386	1385	4	1370
1371	1387	1386	4	1371	1372
1388	1387	4	1372	1373	1389
1388	4	1373	1374	1390	1389
4	1374	1375	1391	1390	4
1375	1360	1376	1391	16	1376
1377	1378	1379	1380	1381	1382
1383	1384	1385	1386	1387	1388
1389	1390	1391
